# Supplementary material for: Candida rugosa lipase covalently immobilized on facilely-synthesized carbon nitride nanosheets as a novel biocatalyst
Source: Royal Society of Chemistry journal article supplement (doi:10.1039/c8ra00536b), 2018-01-01
Supplement: c8ra00536b1.pdf [file c8ra00536b1.pdf]

## Supplementary Information

### ***Candida rugosa* lipase covalent immobilization on facile synthesized carbon nitride nanosheets as novel biocatalysts**

**Ya Li,<sup>‡a</sup> Zhijun Ruan,<sup>‡b</sup> Mingming Zheng,<sup>a</sup> Qianchun Deng,<sup>a</sup> Shan Zhang,<sup>a</sup> Chang Zheng,<sup>a</sup> Hu Tang,<sup>a</sup> Fenghong Huang<sup>\*a</sup> and Jie Shi<sup>\*a</sup>**

<sup>a</sup> Hubei Key Laboratory of Lipid Chemistry and Nutrition, Oil Crops and Lipids Process Technology National & Local Joint Engineering Laboratory, Key Laboratory of Oilseeds Processing, Ministry of Agriculture, Oil Crops Research Institute, Chinese Academy of Agricultural Sciences, Wuhan 430062, China.

<sup>b</sup> Hubei Key Laboratory of Processing and Application of Catalytic Materials, College of Chemistry and Chemical Engineering, Huanggang Normal University, Huanggang 438000, China.

<sup>‡</sup>These authors equally contributed to this study.

\*Author for correspondence: huangfh@oilcrops.cn, shijie@caas.cn,

**Table S1.** Kinetic parameters for the free CRL and C<sub>3</sub>N<sub>4</sub>-NS@CRL.

| Lipase                                | K <sub>m</sub> (μM) | V <sub>m</sub> (U/g) | specific activity (U/mg) |
|---------------------------------------|---------------------|----------------------|--------------------------|
| C <sub>3</sub> N <sub>4</sub> -NS@CRL | 23.17 ± 3.59        | 6329.8 ± 636.4       | 141.7                    |
| free CRL                              | 0.27 ± 0.02         | 41.15 ± 0.66         | 0.37                     |

The Michaelis-Menten kinetic parameters of free CRL and C<sub>3</sub>N<sub>4</sub>-NS@CRL were determined by measuring the lipase activity using *p*-NPP as substrate in the initial concentration range from 0.19 to 19 μmol/L at the 30 °C and 0.1M pH 7.0 PBS. The values of kinetic parameters K<sub>m</sub> and V<sub>m</sub> were obtained by fitting the experimental data to the Michaelis-Menten model using non-linear regression code.

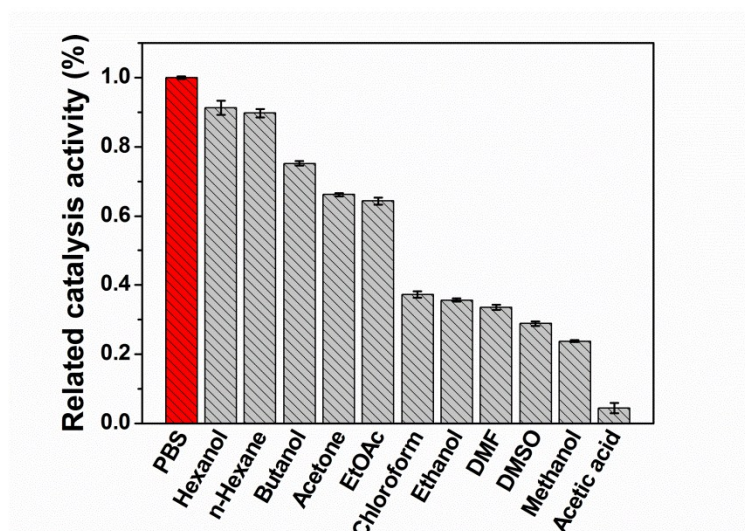

**Figure S1** Effect of different organic solvents on relative activity of the  $C_3N_4$ -NS@CRL.

The organic solvent tolerant ability of this immobilized CRL was studied by incubating the biocatalyst in 0.1 M pH 7.0 PBS buffer and different organic solvents for 30 min at 37 °C, and collected by refrigerated centrifugation, dried with nitrogen purge, then their residual activities were assayed by the hydrolysis of *p*-NPP. Residual activity was expressed as percentage of the enzyme activity of  $C_3N_4$ -NS@CRL under PBS buffer (considered as 100%).

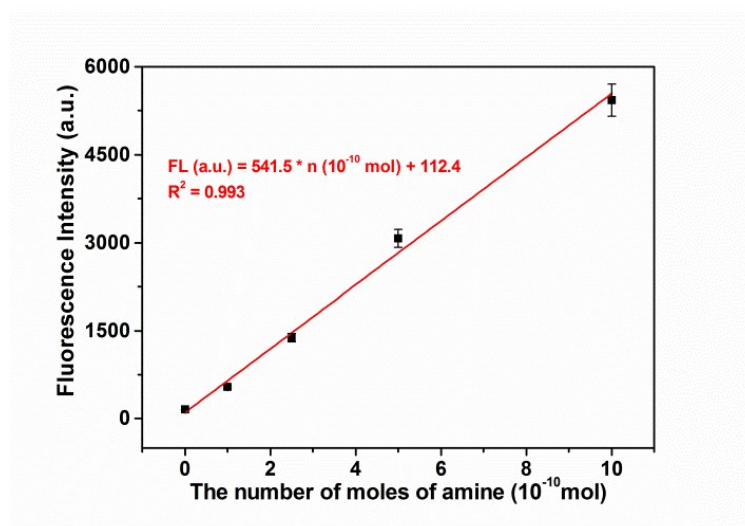

**Figure S2** Fluorescence intensity of fluorescamine method plotted as a function of increasing amounts of amino groups of fresh APTES.

Borate buffer (0.1 mol/L, pH 8.0, 190  $\mu$ L) and 20  $\mu$ L of APTES solution were mixed. When detecting, 90  $\mu$ L fluorescamine solution (1 mg/mL in acetonitrile) was added to the mixture. Excitation wavelength was set at 392 nm. For assay of C<sub>3</sub>N<sub>4</sub>-NS, 10 mg/mL nanoparticles was used as analyte.
